1 **Convective forces increase CXCR4-dependent glioblastoma cell invasion in GL261 murine model**

2

3 R. Chase Cornelison<sup>1</sup>, Caroline E. Brennan<sup>2</sup>, Kathryn M. Kingsmore<sup>2</sup>, and Jennifer M. Munson<sup>1\*</sup>

4 <sup>1</sup>*Department of Biomedical Engineering and Mechanics, Virginia Polytechnic Institute and State*  
5 *University, Blacksburg, VA 24061*

6 <sup>2</sup>*Department of Biomedical Engineering, University of Virginia, Charlottesville, VA 22908*

7

8 **Keywords:** Glioblastoma, invasion, interstitial fluid flow, convection enhanced delivery, CXCR4,  
9 CXCL12

10

11

12 Grant Support: ACS-IRG-81-001-29 and R01CA222563-01 to JMM

13

14 \*Address correspondence and reprint requests to:

15 Dr. Jennifer M. Munson

16 349 Kelly Hall

17 325 Stanger Street (MC 0298)

18 Blacksburg, VA 24061

19 Phone: (540) 231-7896

20 Fax: (540) 231-9738

21 Email: [jm4kt@vt.edu](mailto:jm4kt@vt.edu)

## 22 **Abstract**

23 Glioblastoma is the most common and malignant form of brain cancer. Its invasive nature limits  
24 treatment efficacy and promotes inevitable recurrence. Previous *in vitro* studies have shown that  
25 interstitial fluid flow, a factor characteristically increased in cancer, increases glioma cell invasion via  
26 CXCR4-CXCL12. It is currently unknown if these effects translate *in vivo*. Using the therapeutic  
27 technique of convection enhanced delivery (CED), we tested if convective flow alters glioma invasion *in*  
28 *vivo* using the syngeneic GL261 mouse model of glioblastoma. We first confirmed that GL261 invasion  
29 *in vitro* increased under flow in a CXCR4-CXCL12 dependent manner. Additionally, approximately  
30 65.4% and 6.59% of GL261 express CXCR4 and CXCL12 *in vivo*, respectively, with 3.38% expressing  
31 both. Inducing convective flow within implanted tumors indeed increased glioma cell invasion over  
32 untreated controls, and administering CXCR4 antagonist AMD3100 (5 mg/kg) effectively eliminated this  
33 response. Therefore, glioma invasion is in fact stimulated by convective flow *in vivo* through CXCR4. We  
34 also analyzed patient samples to show that expression of CXCR4 and CXCL12 increase in patients  
35 following therapy. These results suggesting that targeting flow-stimulated invasion may prove beneficial  
36 as a second line of therapy, particularly in patients chosen to receive convection enhanced drug delivery.

## 37 **Introduction**

38 Glioblastoma (GBM) is the most aggressive form of brain cancer and is characterized by invasion  
39 into the surrounding brain or parenchyma<sup>1,2</sup>. This invasiveness causes diffuse borders between the tumor  
40 and parenchyma, preventing effective resection of all malignant cells. Additionally, because tumor cells  
41 that have invaded into the surrounding healthy tissue are increasingly resistant to radiation and  
42 chemotherapy, GBM always recurs<sup>3,4</sup>. Therefore, understanding and targeting molecules that regulate  
43 glioma cell invasion has therapeutic implications in the treatment of GBM. One signaling axis known to  
44 regulate GBM invasion is the CXCR4-CXCL12 pathway. While a potent driver of GBM invasion in  
45 static conditions, CXCR4- and CXCL12-mediated invasion in GBM can be enhanced by interstitial fluid  
46 flow through a mechanism known as autologous chemotaxis<sup>5-7</sup>. Interstitial flow is the movement of fluid

47 from the vasculature throughout the interstitial tissue space toward draining lymphatics or clearance  
48 pathways. This process normally acts to maintain tissue homeostasis, but the leaky nascent vasculature  
49 and increased waste production in solid cancers can dramatically increase interstitial pressure and, in turn,  
50 interstitial flow<sup>1,8</sup>.

51 We previously showed that rat and human GBM cell lines respond to flow *in vitro* by increasing  
52 invasion<sup>6,7</sup>. Furthermore, regions of high flow (identified by arterial extravasation of Evans blue)  
53 correlated with regions of invasion for cell lines as well as patient-derived glioma stem cells<sup>6,7</sup>. Flow-  
54 stimulated invasion was mitigated by both blocking the receptor CXCR4 as well as saturating the ligand  
55 CXCL12, suggesting this chemokine-receptor pathway plays a key role in glioma cell flow response. It  
56 remains unknown, however, if interstitial flow directly stimulated cancer cell invasion *in vivo* and if  
57 CXCR4 signaling was similarly implicated. Answering these questions requires a technique to induced  
58 convective forces within the tumor *in situ* at a time when heightened interstitial flow may not be fully  
59 established on its own.

60 Convection enhanced delivery (CED) is an experimental technique used in the clinic to overcome  
61 high intra-tumoral pressure and increase drug distribution via local infusion<sup>9,10</sup>. A blunt needle is placed  
62 into the center of the tumor, and a drug-laden solution is infused to drive drug transport. In essence, CED  
63 drives convective flow through the interstitial spaces in the tumor, mimicking interstitial fluid flow. We  
64 used CED in a murine model of GBM to test the hypothesis that convective flow directly stimulates  
65 cancer cell invasion *in vivo* and examine the dependence of this response on CXCR4 signaling.

## 66 **Results**

### 67 *GL261 exhibit flow-stimulated invasion in vitro in a CXCR4-dependent manner*

68 Prior to *in vivo* assessment, the flow response of GL261 cells was examined *in vitro* using a 3D tissue  
69 culture insert model (**Fig. 1A**)<sup>6</sup>. Under static conditions, 0.1-0.2% of GL261 invaded beyond the semi-  
70 permeable membrane (**Fig. 1B**). The addition of gravity-driven flow significantly increased the percent of

71 cells invading by approximately 1.6 fold ( $t(4)=5.931$ ,  $n=5$ ,  
72  $p<0.01$ ). This flow-stimulated increase in invasion could be  
73 mitigated by blocking CXCR4 using 10  $\mu\text{M}$  AMD3100, a  
74 small molecule inhibitor of CXCR4 ( $t(4)=2.722$ ,  $n=5$ ,  $p>0.1$ ).  
75 Similar results were observed for saturating the cultures (in  
76 the gel and both sides of the transwell) with 100 nM  
77 CXCL12. Ligand saturation significantly decreased the  
78 effects of flow ( $t(4)=3.545$ ,  $n=5$ ,  $p<0.05$ ) (**Fig. 1C**), returning  
79 invasion to untreated levels ( $t(3)=2.293$ ,  $n=4$ ,  $p>0.1$ ). Hence,  
80 the flow response of GL261 aligns with the previously  
81 proposed mechanism of CXCR4-CXCL12 autologous  
82 chemotaxis<sup>1</sup>.

83 *CXCR4<sup>+</sup> and CXCR4<sup>+</sup>CXCL12<sup>+</sup> populations are enriched*  
84 *within in vivo tumor samples*

85 Because the significance of targeting autologous  
86 chemotaxis and flow-stimulated invasion may be influenced  
87 by expression levels, we used flow cytometry to characterize  
88 GL261 expression of CXCR4 and CXCL12 in different  
89 environments. The dimensionality of culture significantly  
90 impacted receptor and ligand expression. In 2D, few cells

91 expressed the receptor, ligand, or both (**Fig. 2**). Embedding the cells in 3D hydrogels significantly  
92 increased the number of CXCR4<sup>+</sup> cells to  $8.13 \pm 1.71\%$  compared to  $1.83 \pm 0.25\%$  in 2D culture  
93 ( $t(3)=3.389$ ,  $n=4$ ,  $p<0.05$ ) (**Fig. 2A**). Similar effects were observed on the CXCL12 population ( $t(3)=4.14$ ,  
94  $n=4$ ,  $p<0.05$ ) (**Fig. 2B**). While there was no difference in the percentage of CXCR4<sup>+</sup>CXCL12<sup>+</sup> cells  
95 between 2D and 3D *in vitro* culture (**Fig. 2C**), this double positive population increased from  $1.66 \pm$

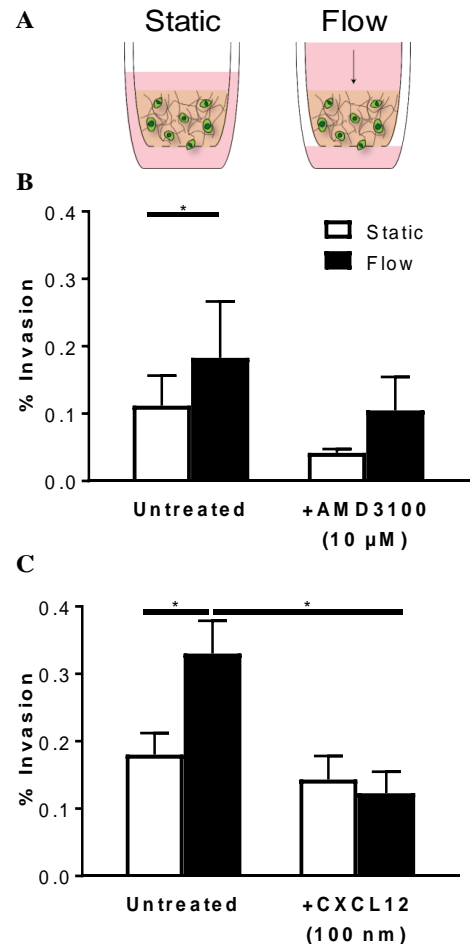

**Figure 1. Interstitial flow increases GL261 invasion in a CXCR4-CXCL12 dependent manner.** A) Schematic representation of tissue culture insert setup for static and flow experimental conditions. B) Percent invasion of GL261 in static and flow conditions with and without addition of 10  $\mu\text{M}$  AMD3100 ( $n=5$ ,  $*p=0.01$ ). C) Percent GL261 invasion in static and flow conditions with and without addition of 100 nM CXCL12 ( $n=4$ ,  $*p=0.01$ ). Bars show standard error.

96 0.72% in 3D to  $3.38 \pm 0.49\%$  of total cells *in vivo* ( $t(8)=2.767$ ,  $n=6$  *in vivo* and  $n=4$  *in vitro*,  $p<0.05$   
 97 compared to 3D). These effects were further amplified for CXCR4 single expression, dramatically  
 98 increasing from  $8.13 \pm 1.71\%$  in 3D to  $65.4 \pm 5.19\%$  *in vivo* ( $t(8)=8.653$ ,  $n=6$  *in vivo* and  $n=4$  *in vitro*,  
 99  $p<0.0001$  compared to 3D).

100 Expression of CXCL12 *in vivo*  
 101 was similar to that in 3D  
 102 culture. Given the role of this  
 103 receptor/ligand pair on flow  
 104 response, an enrichment in  
 105 CXCR4<sup>+</sup> and  
 106 CXCR4<sup>+</sup>CXCL12<sup>+</sup> populations  
 107 may increase the potential for  
 108 flow-stimulated invasion *in*  
 109 *vivo*.

110 *Glioma invasion in vivo is*  
 111 *enhanced by convective flow*

112 We examined the  
 113 effects of convective forces on  
 114 glioma cell invasion *in vivo*  
 115 using the therapeutic technique  
 116 of convection enhanced delivery  
 117 (CED). A cartoon of the process  
 118 is shown in **Figure 3A**, and an  
 119 experimental timeline in **Figure**

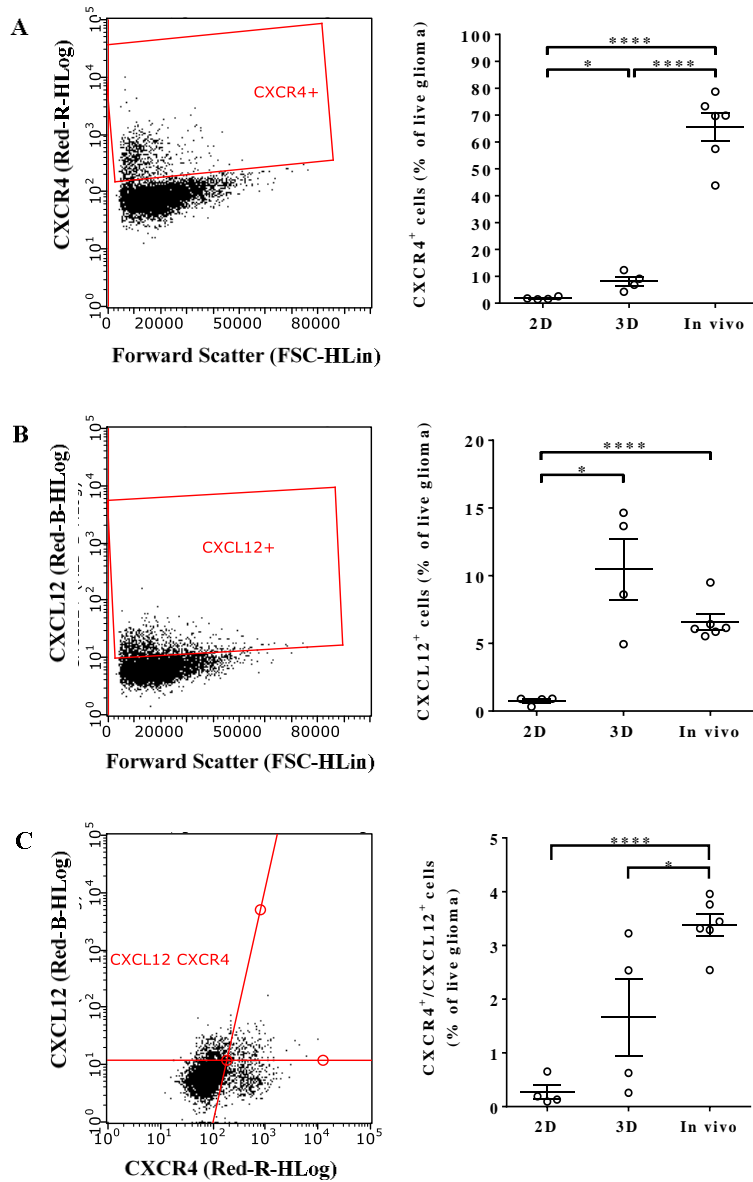

**Figure 2. Population-level expression of CXCR4 and CXCL12 in GL261 depends on growth conditions.** Flow cytometry was used to determine the percent of CXCR4<sup>+</sup>, CXCL12<sup>+</sup>, and double positive GL261 in 2D, 3D, and *in vivo* environments. Representative plots gated on live glioma cells are shown in the left column for (A) CXCR4, (B) CXCL12, and (C) double positive populations. Correlating quantifications are shown on the right. \* $p<0.05$ , \*\*\*\* $p<0.0001$ . Bars

120 **3B.** First, magnetic resonance imaging was used to verify the ability to induce fluid convection using  
121 CED. A gadolinium contrast agent conjugated to albumin (Galbumin, 25 mg/mL) was infused into the  
122 tumors at day 7 at a rate of 1  $\mu$ L/min. Immediately following CED, the mice were transferred to a 7 Tesla  
123 MRI machine to visualize changes in galbumin distribution over time. Five representative slices are  
124 shown for one mouse. T2-weighted images were used to identify the location of the tumors (**Suppl. Fig.**  
125 **2A**). Using T1-weighted imaging, the signal intensity of intra-tumoral galbumin was observed to change  
126 over a 30 minute period, indicative of contrast agent flux (**Suppl. Fig. 2B**).

127         Following verification that CED does induce convective flow, a second cohort of mice was used  
128 to examine invasion. Convective flow was again induced seven days after tumor inoculation at 1  $\mu$ L/min,  
129 and invasion was assessed two days later using immunohistochemistry. Representative images are shown  
130 in **Figures 3C-J**, with invasion quantification summarized in **Figure 3K**. Untreated (static) tumors had  
131 approximately  $5.75 \pm 0.938$  cells/mm<sup>2</sup> invaded beyond the tumor border into the surrounding tissue.  
132 Following CED, the number of invading cells significantly increased to  $12.2 \pm 2.4$ /mm<sup>2</sup> (**Fig. 3E-F, K**)  
133 ( $t(12)=2.433$ ,  $n=7$ ,  $p<0.05$ ). This greater than 2-fold increase to invasion *in vivo* was even more  
134 pronounced than the *in vitro* results (increased approximately 1.5-fold under flow).

#### 135 *Effects of flow in vivo are mediated through CXCR4*

136 Given the ability of CXCR4 antagonism to reduce flow-stimulated invasion *in vitro*, we also examined  
137 the effects of administering the CXCR4 antagonist AMD3100 (5 mg/kg) systemically with and without  
138 CED <sup>11</sup>. This drug has been delivered to *in vivo* glioma models previously and shows some clinical  
139 potential as a secondary therapy <sup>12-14</sup>. In the absence of convective flow (**Fig. 3G-H, K**), AMD3100 did  
140 not significantly alter glioma cell invasion compared to untreated controls at  $5.12 \pm 0.490$ /mm<sup>2</sup>  
141 ( $t(12)=0.6008$ ,  $n=7$ ,  $p>0.1$ ). However, applying CED in mice treated with AMD3100 (**Fig. 3I-J, K**)  
142 significantly reduced the effects of flow on invasion compared to CED alone ( $t(12)=3.026$ ,  $n=7$ ,  $p<0.05$ ).  
143 This treatment regimen effectively maintained the number of cells invading beyond the tumor border to  
144  $4.38 \pm 0.731$  cells/mm<sup>2</sup>, not significantly different from that of untreated, static controls. Hence, dosing

145 with AMD3100 prior to convection is able to mitigate flow-stimulated increases to glioma cell invasion.  
 146 This decrease in flow-stimulated invasion with AMD3100 treatment was associated with a decrease in

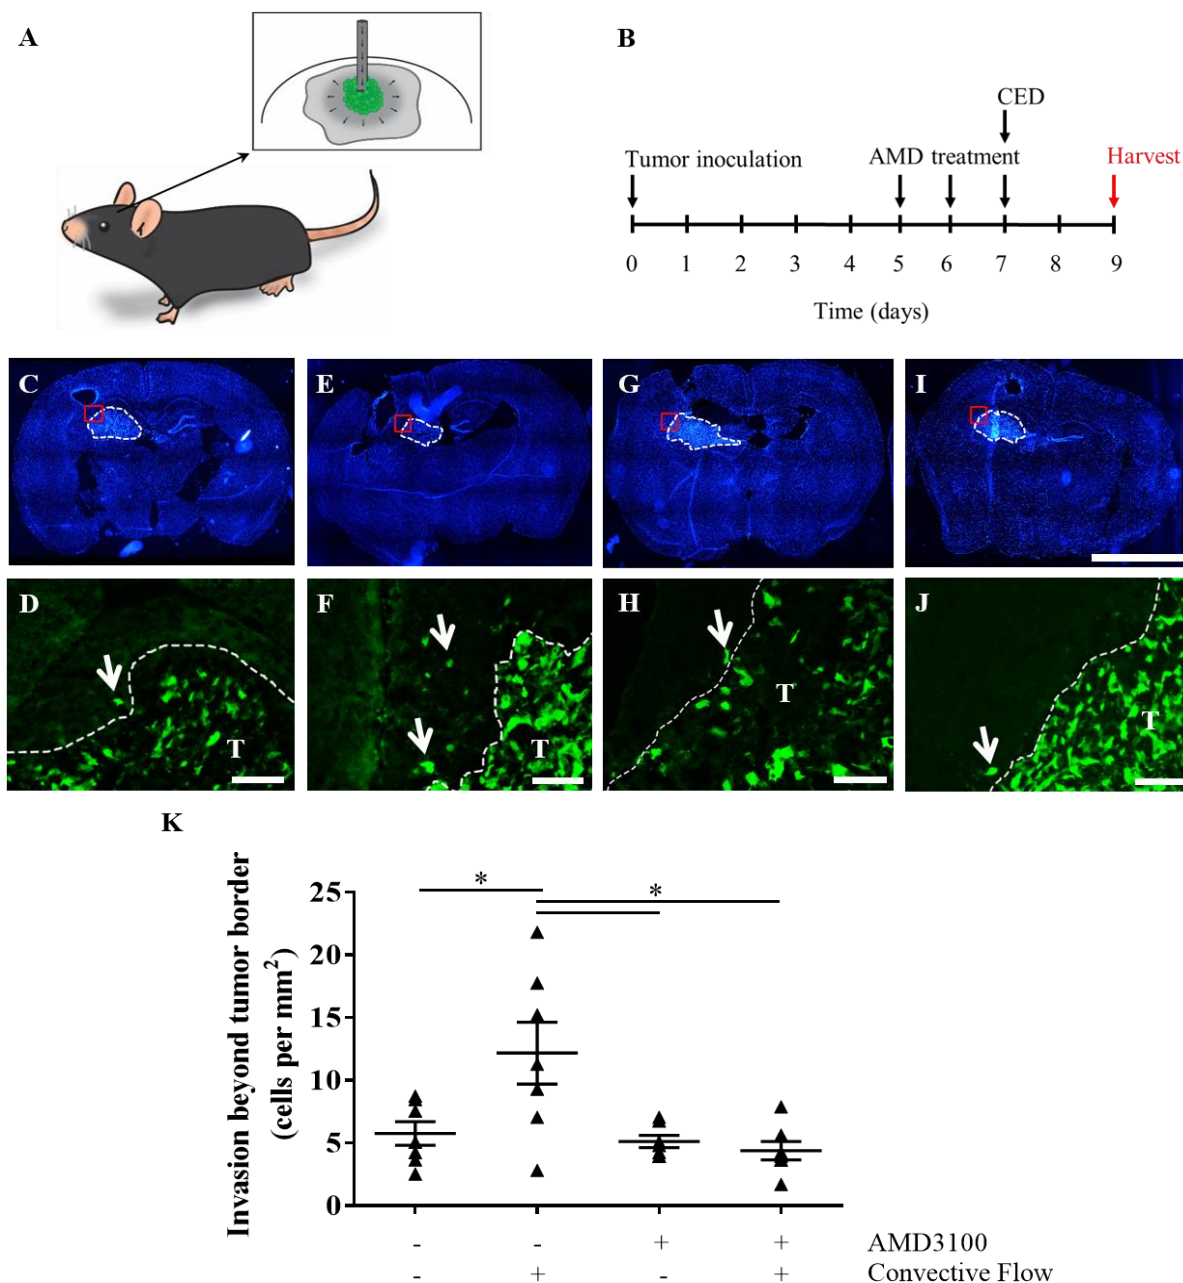

**Figure 3: Interstitial flow increases murine glioma cell invasion *in vivo* in a CXCR4-dependent manner.** (A) Schematic of intratumoral convection enhanced delivery. (B) Experimental timeline. (C-J) Representative fluorescence images of *in vivo* glioma invasion for (C-D) untreated controls, (E-F) CED alone group, (G-H) AMD alone group, and (I-J) +CED/+AMD group. Top: Full brain slice scans with nuclei labeled with DAPI (blue), with tumor defined by white dotted line. Scale bar= 1 mm. Bottom: GFP-labeled GL261 tumor cells at the border location depicted above (red boxes). Scale bar=100 $\mu$ m. (K) Quantification of tumor cells beyond the tumor border averaged per mouse from five locations in three sections through tumors. Bars show standard error.

147 CXCR4 phosphorylation, an indicator of receptor stimulation and signaling <sup>6</sup>. Untreated tumors exhibited  
148 moderate immunoreactivity for phosphorylated CXCR4 (**Fig. 4A**), indicating that this signaling pathway  
149 is basally active within GL261 tumors *in vivo*. Consistent with prior *in vitro* results, applying flow via  
150 CED markedly increased pCXCR4 immunoreactivity *in vivo* (**Fig. 4B**). Administering AMD3100 prior to  
151 CED effectively attenuated increased pCXCR4 staining, observably decreasing immunoreactivity below  
152 that of untreated controls (**Fig. 4C**). No qualitative differences were observed in total CXCR4 expression  
153 (data not shown). Hence, interstitial flow is indeed able to stimulate invasion of glioma cells *in vivo*  
154 mediated at least in part through CXCR4 signaling.

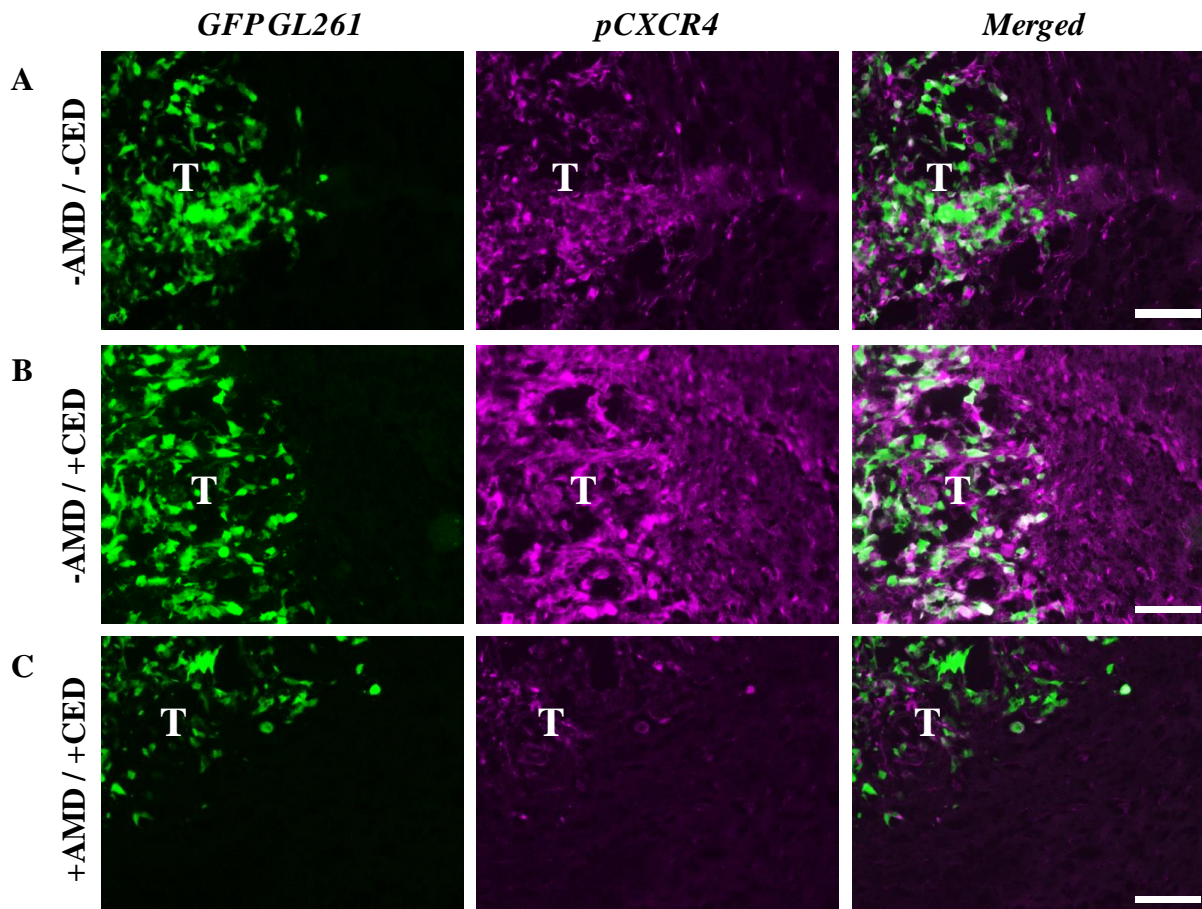

**Figure 4. Treatment of GL261 with AMD3100 decreases convection-driven increases in pCXCR4.** Representative fluorescence images at GL261 tumor (T) borders of GFP-GL261 (green) and pCXCR4 (magenta) in (A) untreated animals, (B) animals receiving only CED, and (C) animals dosed with AMD3100 for two days prior to CED. Scale bars = 100  $\mu$ m.



155 *Standard of care therapy may increase CXCR4 and CXCL12 expression in patients*

156 Convection enhanced delivery is experimentally used in the clinic to deliver a secondary therapy,  
157 meaning it is implemented after the standard of care radiation therapy and chemotherapy. Therefore, it is  
158 important to consider the implications of therapy on the predisposition to flow stimulated cancer cell  
159 invasion. We qualitatively examined the expression of CXCR4 and CXCL12 in samples obtained from  
160 six patients diagnosed with glioblastoma prior to their receiving therapy and six patients after standard of  
161 care therapy (**Fig. 5A-H**). CXCL12 staining was generally more intense and widespread throughout the

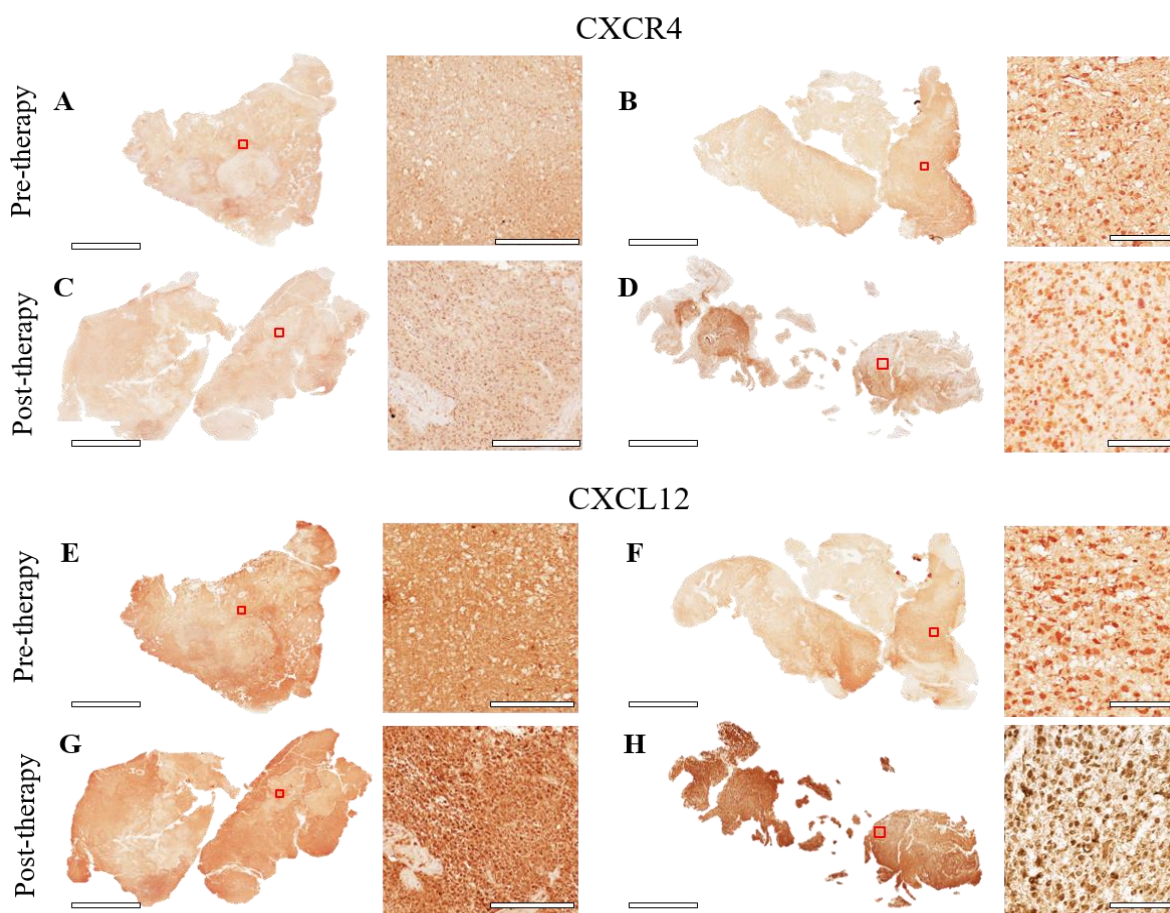

**Figure 5. Cellular CXCR4 and CXCL12 –positivity increase in samples from patients who have received standard of care therapy.** Twelve glioblastoma patient samples were grouped based on therapy status. Representative images are shown for four patients pre or post- standard of care temozolomide and radiation therapy immunostained for either CXCR4 (A-D) or its ligand CXCL12 (E-H) and counterstained with hematoxylin. The location of the inset image is outlined in red. Scale bars=7 mm for tissue scans, and 200  $\mu$ m for inset images.

162 tissue than CXCR4, likely attributable to its role as a soluble cytokine. Pre-therapy samples were lightly  
163 positive for CXCR4 and many nuclei in the malignant regions did not appear to be associated with  
164 CXCR4 reactivity (**Fig. 5A-B**). Conversely, staining intensity appeared greater in samples obtained from  
165 patients who received therapy (**Fig. 5C-D**). Similar trends were also observed for CXCL12 staining, with  
166 perhaps a more dramatic difference between pre-therapy samples (**Fig. 5E-F**) and post-therapy samples  
167 (**Fig. 5G-H**).

## 168 **Discussion**

169 Interstitial fluid flow is a key component of normal physiology; however, emerging evidence  
170 suggests that this biomechanical force may also contribute to cancer malignancy (Munson and Shieh,  
171 2014). The phenomenon is studied most extensively in breast cancer, where interstitial flow influences  
172 both the direction and magnitude of cancer cell migration and promotes activation of, and matrix  
173 remodeling by, relevant stromal cells <sup>5,15-18</sup>. Regarding GBM, paths of brain tumor dissemination  
174 correlate with bulk fluid pathways <sup>19</sup>. Only recently we showed that interstitial flow indeed increases  
175 invasion of both murine and human glioma cells through the chemokine receptor-ligand pair CXCR4 and  
176 CXCL12 <sup>6,7</sup>. Nonetheless, the causal effects of flow on cancer cell invasion are currently known  
177 exclusively from *in vitro* experiments since previous *in vivo* data is only correlative. The goal of the  
178 current study was to elucidate the ability for interstitial fluid flow to directly stimulate glioma cell  
179 invasion in the brain.

180 The therapeutic technique of convection enhanced delivery (CED) was used to induce convective  
181 flow *in situ* within brain tumors, as evidenced by rapid contrast agent elimination. CED, a catheter-based  
182 method to by-pass transport limitations between the vasculature and the high-pressure tumor bulk, has  
183 been used experimentally and tested clinically for enhancing local perfusion of chemotherapeutics or  
184 other drugs in the treatment of GBM <sup>10,20,21,22</sup>. It was found that applying CED at 1  $\mu\text{L}/\text{min}$  – the lower  
185 end of the clinically-relevant range of 1-5  $\mu\text{L}/\text{min}$  <sup>9</sup> – significantly increased GL261 cell invasion  
186 compared to untreated controls, based on analysis two days after flow application. This greater than 2-

187 fold differential was more pronounced than in comparative *in vitro* experiments, suggesting an enhanced  
188 contribution of flow-stimulated invasion *in vivo*. One possible explanation for this pronounced effect is  
189 that CXCR4 expression was found to dramatically increase on GL261 cells upon implantation (from 8.13  
190  $\pm 1.71\%$  in 3D to  $65.4 \pm 5.19\%$  *in vivo*,  $p < 0.0001$ ).

191 Because glioma cells can also express CXCL12, the ligand for CXCR4, it has been proposed that  
192 interstitial flow stimulates migration through a mechanism termed autologous chemotaxis<sup>1,5</sup>. Essentially,  
193 *in vitro* and *in silico* experiments suggest that fluid flow creates an anisotropic ligand gradient around  
194 individual cells in the direction of flow to stimulate directional migration. We previously showed using an  
195 agent based model that only small populations of CXCR4- and CXCL12-expressing cells are required to  
196 exhibit a flow response through this mechanism<sup>7</sup>. A drastic increase in CXCR4 expression *in vivo* may  
197 therefore greatly increase the likelihood of flow-stimulated invasion. Furthermore, although CXCL12  
198 expression did not vary significantly between 3D culture and *in vivo*, CXCL12 is produced by other cells  
199 such as endothelial cells and astrocytes and is also present in the blood<sup>23-25</sup>. Therefore, ligand availability  
200 likely increases upon implantation, independent of cancer cell expression.

201 In the absence of any treatment, we observed moderate reactivity for CXCR4 phosphorylation, a  
202 known marker of receptor activation and signaling. Convective flow increased phospho-CXCR4  
203 immunoreactivity both in the tumor and healthy brain tissue, suggesting the technique of CED may  
204 increase chemokine signaling and thus tumor cell dissemination. Additionally, there may be further  
205 implications of increased CXCR4 phosphorylation in the brain since activation of CXCR4 in glia can lead  
206 to increased neurotoxicity and pro-tumor phenotypes<sup>26,27</sup>. Additional studies are required to examine if  
207 the negative implications of CED (increased invasion and CXCR4 phosphorylation) are counter-balanced  
208 by the cytotoxic effects of an infused drug.

209 Other mechanisms have also been implicated in cancer cell response to flow. In particular, the  
210 hyaluronan-rich glycocalyx can mediate flow-driven mechanotransduction in part through the hyaluronan  
211 receptor CD44<sup>28</sup>. We observed here that CXCR4 signaling may be a primary mechanism by which the

212 GL261 cell line responds to flow, but patient-derived glioma stem cells display heterogeneity in their  
213 dependence on CXCR4, CD44, or both for flow-stimulated invasion<sup>7</sup>. Additionally, blocking CXCR4 did  
214 not eliminate invasion entirely under static or flow conditions. Cancer cell invasion is a multifaceted  
215 process regulated by many mechanisms, as previously reviewed by Sayegh et al.<sup>29</sup>. Thus, here we  
216 identified CXCR4 as a regulator of flow-mediated glioma cell invasion, but other mechanisms can  
217 concurrently enhance infiltration into the brain.

218 While not examined here, it is important to consider that CED is most often used experimentally  
219 after standard radiation and chemotherapy. Previous work demonstrated that radiation induces tumor  
220 invasiveness by increasing tumor-derived CXCL12 at the invasive tumor border, which may enhance the  
221 potential for CXCR4 signaling<sup>30</sup>. Furthermore, irradiation of GL261 cells increased CXCR4 expression  
222 in a dose-dependent manner<sup>31</sup>. Using patient samples, we observed that post-therapy samples had  
223 increased immunoreactivity for both CXCR4 and CXCL12 compared to samples obtained pre-therapy.  
224 These observations suggest that the increased expression found in mice after therapy may hold true in  
225 humans. Beyond chemokine signaling, CXCR4 is also a purported marker of glioma stem cells<sup>32</sup>;  
226 therefore, increases to CXCR4 expression due to radiation may not only increase the potential for flow-  
227 stimulated invasion but also increase malignancy via cancer stem cell expansion. Our data imply that  
228 therapeutic use of CED, while advantageous for increasing drug transport and overall patient survival,  
229 may benefit from supplementation with CXCR4 blockade to preserve the benefit on drug permeance  
230 while preventing undesirable increases to cancer cell invasion.

## 231 **Materials and Methods**

### 232 *In vitro invasion assays*

233 GL261 invasion was assessed *in vitro* using 12-well (Millipore PI8P01250) or 96-well (Corning  
234 3374) tissue culture inserts<sup>1</sup>. Cancer cells were seeded at  $1 \times 10^6$  cells/mL in 3D hydrogels, as described  
235 above. After 20 minutes of gelation, 15  $\mu$ L of fresh medium was applied on top of the gels. Flow was

236 initiated three hours later using serum-free medium, and cultures were maintained overnight. AMD3100  
237 was used at 10  $\mu$ M (Sigma A5602) to block the receptor CXCR4 while an excess of 100 nM CXCL12  
238 (Peprotech 300-28A) was added to prevent chemokine gradient formation. The membranes were then  
239 fixed in 4% paraformaldehyde and counterstained using DAPI (Thermo Fisher D1306). An EVOS FL  
240 fluorescence microscope was used to acquire 20X images of the porous membrane bottom at five random  
241 locations for each sample<sup>33</sup>. The number of invading cells was manually counted for each technical  
242 replicate for  $n \geq 4$  biological replicates.

#### 243 *Lentiviral transfection and in vivo tumor model*

244 All animal procedures were approved by the Institutional Animal Care and Use Committees at the  
245 University of Virginia and Virginia Polytechnic Institute and State University. Lentivirus conferring  
246 expression of green fluorescent protein (GFP) under puromycin antibiotic selection was a generous gift  
247 from the laboratory of Dr. Kevin Janes. Murine GL261 were serially transfected with GFP lentivirus and  
248 purified by selection with 2  $\mu$ g/mL puromycin (Thermo Fisher A1113803). For *in vivo* tumor studies, a  
249 burr hole was drilled into the skull of anesthetized C57BL/6 mice (5-8 weeks; Harlan Laboratories) at  
250 coordinates -2, +2, -2.2 (AP, ML, DV) from bregma. 100,000 GFP<sup>+</sup> GL261 cells were inoculated in 5  $\mu$ L  
251 at 1  $\mu$ L/min, and the bur hole was sealed with bone wax. Ketoprofen was administered at 2 mg/kg for 48  
252 hours to manage pain. One week later, the inoculation site was re-exposed, and a blunt-end 26 gauge  
253 needle was used to infuse 10  $\mu$ L of 1 mg/mL biotinylated dextran amine at 1  $\mu$ L/min. Ketoprofen was  
254 again administered at 2 mg/kg for 48 hours to manage pain.

#### 255 *Flow cytometry*

256 Triplicate wells of 100,000 GL261 cells were cultured in serum-containing medium overnight,  
257 either on 2D tissue culture plastic or in 3D hydrogels comprising 1.5% rat tail collagen (Corning 354236),  
258 0.2% thiolated hyaluronic acid (Glycosil®; ESI Bio GS220), and 0.1% PEGDA (ESI Bio GS3006). The  
259 following day, cells were cultured with 10  $\mu$ M Brefeldin A for 6 hours, harvested, pooled, and subjected

260 to antibody labeling <sup>7</sup>. To assess expression *in vivo*, mice were inoculated with GFP+ tumor cells as  
261 above, and 14 days post-implantation mice were treated with 0.25 mg Brefeldin A for 6 hours via  
262 intraperitoneal injection <sup>34</sup>. The brains were then dissociated for analysis. Briefly, the ipsilateral cortical  
263 hemisphere was isolated into HBSS and slightly trimmed to reduce the number of non-cancerous cells.  
264 The tissue was minced using a scalpel blade, incubated in 5 mL of ACK RBC lysis buffer for 3-5 minutes  
265 at room temperature, and centrifuged at 1100 rpm for 5 minutes. An approximately equal volume of 1.5  
266 mg/mL Liberase DL (Sigma 5466202001) was then added to digest the tissue for 30 minutes on a rocker  
267 at 37°C, pipetting up and down to ensure complete digestion.

268 The tissue slurry was then strained through a 40 micron cell strainer followed by 35 mL of HBSS.  
269 This solution was centrifuged at 1100 rpm for 5 minutes, and the isolated cells were resuspended and  
270 counted for flow cytometry. Primary-conjugated antibodies were used to stain for CXCR4 (eBiosciences  
271 17-9991-80) and CXCL12 (R&D IC350C), along with appropriate isotype controls. Dead cells were  
272 stained using LIVE/DEAD® Fixable Green Dead cell stain kit (Thermo Fisher L23101). Stained samples  
273 were run on a Millipore Guava flow cytometer for a minimum of 50,000 events, and the data was  
274 analyzed using Incyte software. A flow chart of the gating strategy is shown in **Supplemental Figure 1**.  
275 For data analysis, plots were gated based on data from single stained controls. *In vivo* samples were  
276 further gated on GFP<sup>+</sup> cells to assess only GL261. All numbers are shown as percent of live, single cells.

#### 277 *Magnetic resonance imaging*

278 Animals were anesthetized and placed in a 7T Clinscan system (Bruker, Ettlingen, Germany)  
279 equipped with a 30-mm head coil. A T2-weighted image was taken through the head with the following  
280 parameters: repetition time (TR) = 5500 ms, echo time (TE) = 65 ms, field of view (FOV) = 20 mm × 20  
281 mm with a 192 × 192 matrix, slice thickness = 0.5 mm, number of slices = 30, two averages per phase-  
282 encode step requiring a total acquisition time of about 5 min per mouse. For T1-weighted MRI, a 33-  
283 Gauge, blunt-end catheter was placed into the same coordinates for tumor implantation, and 10 µL of 25  
284 mg/mL Glowing Galbumin (BioPAL Inc.) was infused at a rate of 1 µL/min. Approximately 30 minutes

285 later, T1 images were acquired approximately 30 minutes, 1 hour, and 24 hours post-infusion according to  
286 the following parameters: TR = 500 ms, TE = 11 ms, FOV = 20 mm × 20 mm with a 192 × 192 matrix,  
287 slice thickness = 0.7 mm, number of slices = 22, two averages per phase-encode step requiring a total  
288 acquisition time of about 3 min per mouse. Contrast-enhanced T1-weighted images at time t=0 were  
289 subtracted from images at t=30 minutes to generate a difference heat map and visualize changes in  
290 contrast intensity over time.

### 291 *Tissue harvest and immunohistochemistry*

292 Two days after convection enhanced delivery, tumor-bearing mice were overdosed on Euthasol  
293 solution and intracardially perfused with phosphate buffered saline (PBS). Brain tissue was quickly  
294 harvested and bisected at the center of the injection site. The brains were fixed overnight in 4%  
295 paraformaldehyde, cryopreserved in 30% sucrose, and sectioned at 12 μm using a Leica 1950 cryostat.  
296 Tissue sections were blocked in 3% serum and 0.03% Triton X-100 in PBS for 1 hour, then were  
297 incubated overnight at 4 °C with rabbit anti-pCXCR4 (Abcam ab74012) diluted in blocker buffer. The  
298 samples were washed three times with PBS and incubated for 1 hour at room temperature with goat anti-  
299 rabbit 660 diluted in blocking buffer. After washing again, the nuclei were counterstained using DAPI  
300 (Thermo Fisher).

### 301 *In vivo invasion quantification*

302 Fluorescently labeled sections were imaged using an EVOS FL microscope. Five images were  
303 randomly taken around the tumor periphery for each of three sections 120 μm apart for each animal. The  
304 tumor border was identified based on GFP<sup>+</sup> GL261 and nuclear staining, and a blinded investigator  
305 counted the number of GFP<sup>+</sup> tumor cells beyond the border for each image. Data is presented as the  
306 number of invading cells per mm<sup>2</sup> of tissue.

307

308

309 *Patient sample collection and immunohistochemistry*

310 De-identified patient samples of glioblastoma were collected in accordance with the University of  
311 Virginia Institutional Review Board through the Biorepository and Tissue Research Facility with  
312 assistance from pathologists. Eight micron sections were deparaffinized in xylene and graded washed  
313 with ethanol:water to achieve rehydration. The samples were then subjected to boiling in citrate buffer for  
314 30 minutes for antigen retrieval. The same primary antibodies were used as above: CXCR4 (Sigma  
315 GW21075) and CXCL12 (Abcam ab18919). Samples for CXCR4 were treated with goat anti-chicken IgY  
316 HRP secondary (Abcam ab97135) and those for CXCL12 with ImmPRESS™ horse anti-rabbit IgG HRP  
317 (Vector Labs MP-7401) prior to development with DAB. Images were acquired using an Aperio Slide  
318 Scanner and processed using ImageScope. Qualitative assessment was conducted on samples from a six  
319 patients per stain for each therapy status.

320 *Statistics*

321 Analysis of Variance (ANOVA) was performed for comparisons of more than two groups, using  
322 a significance level of 0.05. If significance was identified within the dataset, t-tests were performed to  
323 determine significance between individual groups. Ratio paired t-tests were used to analyze all *in vitro*  
324 data; unpaired t-tests were used to compare *in vitro* data to *in vivo* flow cytometry data; and unpaired  
325 student's t-tests were used to compare experimental groups for *in vivo* invasion. All graphed and reported  
326 descriptive statistics in the text are presented as mean  $\pm$  standard error of the mean, unless otherwise  
327 stated. Inferential statistics are reported as statistics (degrees of freedom)=value, n per group, p value so  
328 that effect size can be determined from our reported data.

329 **Acknowledgments**

330 The authors acknowledge Jack Roy and Stuart Berr in the University of Virginia Molecular  
331 Imaging Core, Dr. Frederick Epstein and Sophia Cui for MRI assistance, Dr. Scott Verbridge for  
332 manuscript feedback, and assistance from the University of Virginia Cardiovascular Research Center



333 Histology Core and the Biospecimen and Tissue Repository Facility. Funding to JMM through ACS-IRG-  
334 81-001-29 and R01CA222563.

335 **Competing interests:** The authors declare no competing interests.

336 **Authors' Contributions:** RCC contributed to study design, conducted data acquisition, analysis, and  
337 interpretation, and prepared the manuscript. CEB contributed to data acquisition for *in vitro* invasion.  
338 KMK conducted magnetic resonance imaging and generated difference maps. JMM conceived the study  
339 and supervised experimental design, analysis and interpretation of data, and manuscript preparation. All  
340 authors reviewed and edited the manuscript.

341 **References**

- 342 <sup>1</sup> J.M. Munson and A.C. Shieh, *Cancer Manag. Res.* **6**, 317 (2014).
- 343 <sup>2</sup> V.A. Cuddapah, S. Robel, S. Watkins, and H. Sontheimer, *Nat. Rev. Neurosci.* **15**, 455 (2014).
- 344 <sup>3</sup> S. Stapleton, D. Jaffray, and M. Milosevic, *Adv. Drug Deliv. Rev.* **109**, 119 (2017).
- 345 <sup>4</sup> F. Klemm and J.A. Joyce, *Trends Cell Biol.* **25**, 198 (2015).
- 346 <sup>5</sup> J.D. Shields, M.E. Fleury, C. Yong, A.A. Tomei, G.J. Randolph, and M.A. Swartz, *Cancer Cell* **11**, 526  
347 (2007).
- 348 <sup>6</sup> J.M. Munson, R. V. Bellamkonda, and M.A. Swartz, *Cancer Res.* **73**, 1536 (2013).
- 349 <sup>7</sup> K.M. Kingsmore, D.K. Logsdon, D.H. Floyd, S.M. Peirce, B.W. Purow, and J.M. Munson, *Integr. Biol.*  
350 **8**, 1246 (2016).
- 351 <sup>8</sup> D.F. Quail and J.A. Joyce, *Cancer Cell* **31**, 326 (2017).
- 352 <sup>9</sup> A.M. Mehta, A.M. Sonabend, and J.N. Bruce, *Neurotherapeutics* **14**, 358 (2017).
- 353 <sup>10</sup> M.A. Vogelbaum and M.K. Aghi, *Neuro. Oncol.* **17**, ii3 (2015).
- 354 <sup>11</sup> Y.X. Liao, Z.Z. Fu, C.H. Zhou, L.C. Shan, Z.Y. Wang, F. Yin, L.P. Zheng, Y.Q. Hua, and Z.D. Cai,  
355 *Oncol. Rep.* **34**, 33 (2015).
- 356 <sup>12</sup> N. Redjal, J.A. Chan, R.A. Segal, and A.L. Kung, *Clin. Cancer Res.* **12**, 6765 (2006).
- 357 <sup>13</sup> M.M. Ali, S. Kumar, A. Shankar, N.R.S. Varma, A.S.M. Iskander, B. Janic, W.B. Chwang, R. Jain, A.  
358 Babajeni-Feremi, T.F. Borin, H. Bagher-Ebadian, S.L. Brown, J.R. Ewing, and A.S. Arbab, *Transl.*  
359 *Oncol.* **6**, 660 (2013).
- 360 <sup>14</sup> A. Rios, S.H. Hsu, A. Blanco, J. Buryanek, A.L. Day, M.F. McGuire, and R.E. Brown, *Oncoscience* **3**,  
361 156 (2016).
- 362 <sup>15</sup> M. Pisano, V. Triacca, K.A. Barbee, and M.A. Swartz, *Integr. Biol. (Camb).* **7**, 525 (2015).
- 363 <sup>16</sup> U. Haessler, J.C.M. Teo, D. Foretay, P. Renaud, and M.A. Swartz, *Integr. Biol.* **4**, 401 (2012).
- 364 <sup>17</sup> A.C. Shieh, H.A. Rozansky, B. Hinz, and M.A. Swartz, *Cancer Res.* **71**, 790 (2011).
- 365 <sup>18</sup> W.J. Polacheck, J.L. Charest, and R.D. Kamm, *Proc. Natl. Acad. Sci.* **108**, 11115 (2011).
- 366 <sup>19</sup> C.P. Geer and S.A. Grossman, *J. Neurooncol.* **32**, 193 (1997).
- 367 <sup>20</sup> A. Arshad, B. Yang, A.S. Bienemann, N.U. Barua, M.J. Wyatt, M. Woolley, D.E. Johnson, K.J. Edler,  
368 and S.S. Gill, *PLoS One* **10**, (2015).
- 369 <sup>21</sup> C. Zhang, E.A. Nance, P. Mastorakos, J. Chisholm, S. Berry, C. Eberhart, B. Tyler, H. Brem, J.S. Suk,  
370 and J. Hanes, *J. Control. Release* **263**, 112 (2017).
- 371 <sup>22</sup> N.U. Barua, K. Hopkins, M. Woolley, S. O'Sullivan, R. Harrison, R.J. Edwards, A.S. Bienemann, M.J.  
372 Wyatt, A. Arshad, and S.S. Gill, *Drug Deliv.* **23**, 167 (2016).
- 373 <sup>23</sup> R. Wurth, A. Bajetto, J.K. Harrison, F. Barbieri, and T. Florio, *Front. Cell. Neurosci.* **8**, (2014).
- 374 <sup>24</sup> R.D. Berahovich, B.A. Zabel, S. Lewén, M.J. Walters, K. Ebsworth, Y. Wang, J.C. Jaen, and T.J.  
375 Schall, *Immunology* **141**, 111 (2014).

- 376 <sup>25</sup> M. Li and R.M. Ransohoff, *Prog. Neurobiol.* **84**, 116 (2008).
- 377 <sup>26</sup> P. Bezzi, M. Domercq, L. Brambilla, R. Galli, D. Schols, E. De Clercq, A. Vescovi, G. Bagetta, G.  
378 Kollias, J. Meldolesi, and A. Volterra, *Nat. Neurosci.* **4**, 702 (2001).
- 379 <sup>27</sup> L. Mercurio, M.A. Ajmone-Cat, S. Cecchetti, A. Ricci, G. Bozzuto, A. Molinari, I. Manni, B. Pollo, S.  
380 Scala, G. Carpinelli, and L. Minghetti, *J. Exp. Clin. Cancer Res.* **35**, (2016).
- 381 <sup>28</sup> H. Qazi, R. Palomino, Z.-D. Shi, L.L. Munn, and J.M. Tarbell, *Integr. Biol.* **5**, 1334 (2013).
- 382 <sup>29</sup> E.T. Sayegh, G. Kaur, O. Bloch, and A.T. Parsa, *Mol. Neurobiol.* **49**, 1212 (2014).
- 383 <sup>30</sup> S.C. Wang, C.F. Yu, J.H. Hong, C.S. Tsai, and C.S. Chiang, *PLoS One* **8**, (2013).
- 384 <sup>31</sup> W. Zhou, Y. Xu, X. Li, G. Gao, Z. Jiang, and Z. Shao, *J. Int. Med. Res.* **42**, 926 (2014).
- 385 <sup>32</sup> X. Zheng, Q. Xie, S. Li, and W. Zhang, *Oncol. Res.* **19**, 555 (2011).
- 386 <sup>33</sup> A.R. Harris, J.X. Yuan, and J.M. Munson, *Methods* (2017).
- 387 <sup>34</sup> B. Foster, C. Prussin, F. Liu, J.K. Whitmire, and J.L. Whitton, *Curr. Protoc. Immunol.* 1 (2001).
- 388
